# Supplementary material
Source: Springer Nature journal article supplement (https://www.springermedizin.de/resource/supplementary/12905_2008_152_MOESM1_ESM.pdf/9519192)
Supplement: MOESM1 [file 9519192]

Physical  
Well-being

Psychosocial  
Well-being

Sexual  
Well-being

Satisfaction  
With Breasts

Satisfaction  
With  
Outcome

Satisfaction  
With Care
